# Supplementary material for: Influence of MWCNTs on β-Phase PVDF and Triboelectric Properties
Source: Hindawi journal article supplement (doi:10.1155/2017/2697382), 2017-01-01
Supplement: f1 [file 2697382.f1.docx]

**Supplementary Data**

**Influence of MWCNTs on β-phase PVDF and triboelectric properties**

*Sejung Kim*1,2 , *Youngjun Song*2, *Michael J. Heller*3*

1 Materials Science and Engineering, University of California San Diego, La Jolla, CA 92093 (USA)

2 Department of Electrical and Computer Engineering, University of California San Diego, La Jolla, CA 92093 (USA)

3 Department of Nanoengineering, University of California San Diego, La Jolla, CA 92093 (USA)

* Corresponding author: mheller@ucsd.edu

**1. PCNTs characterization**

The morphology of the PCNTs was investigated by a scanning electron microscope (SEM), shown in Figure S1a, which demonstrates the entangled individual features on the substrate. In Figure S1b, the FT-IR was carried out to investigate the surface modification with pyrene butyric acid (PBA) and the peaks at 2950 cm-1 and 2873 cm-1 are assigned to the C-H stretching of –CH2- groups, and the peaks at 1731 cm-1 and 1231 cm-1 correspond to the carboxylic C=O and C-O stretching vibrations, respectively, while the pure MWCNTs have no distinctive peak compared to PCNTs.


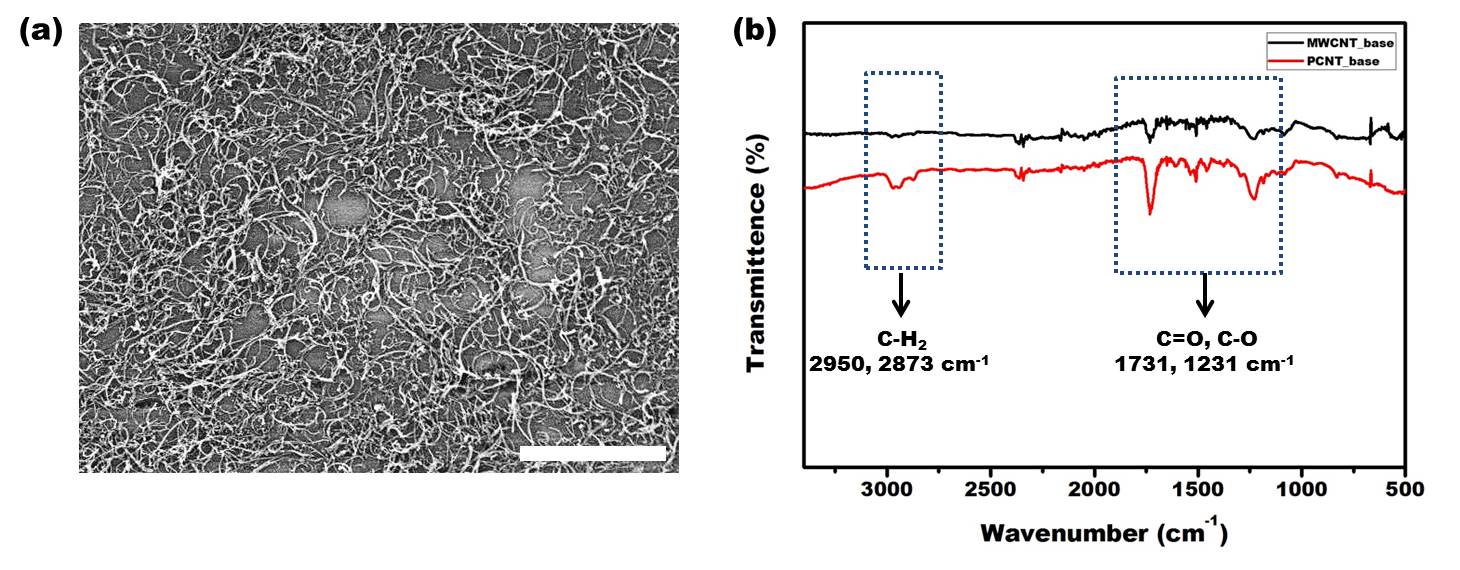


**Figure S1.** (a) SEM image of chemically modified MWCNTs (PCNTs) with scale bar of 5 μm. (b) FT-IR spectra comparison of pure MWCNTs and PCNTs.

**2. Single cycle voltage output performance**

The output signal of the pure PVDF and PVDF-10PCNT composite film-based triboelectric devices was recorded by an oscilloscope. The single cycle voltage output is determined at 1.17 and 0.93 seconds for the pure PVDF and PVDF-10PCNTs, respectively, for a 3 Hz periodic mechanical deformation.


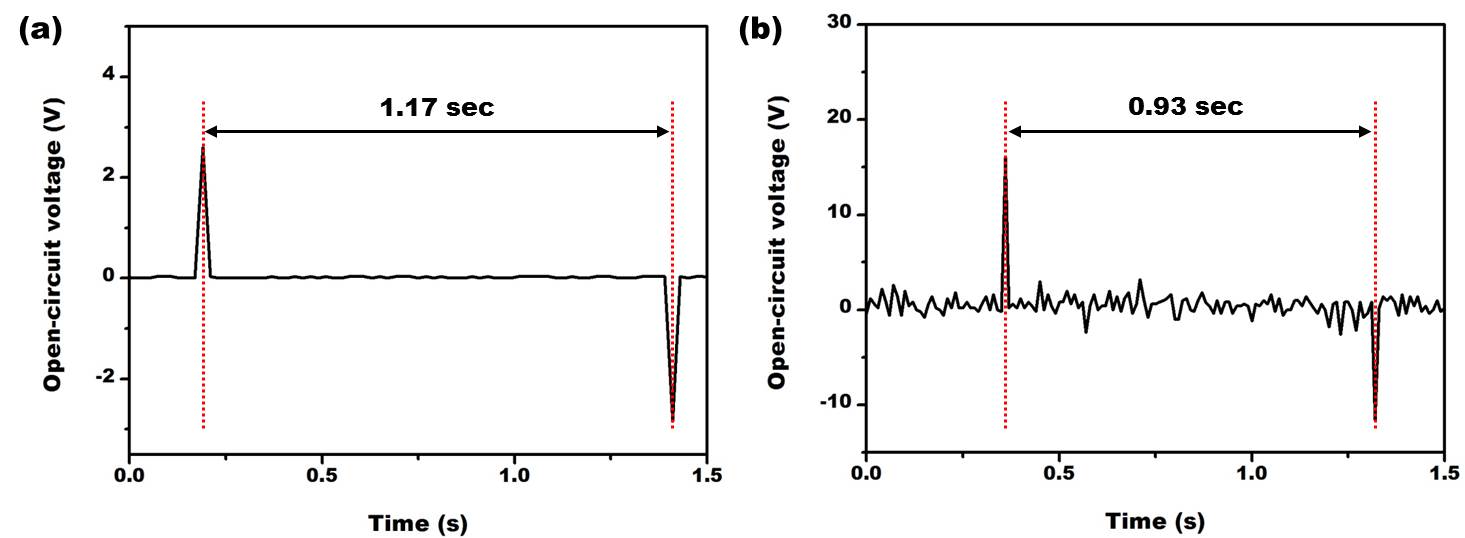


**Figure S2.** Comparison of triboelectric outputs according to the time interval between pressure and release of (a) pure PVDF and (b) PVDF-10PCNTs.
